# Supplementary material
Source: PubMed Central journal article supplement (PMC1805583)
Supplement: pnas_0611571104_3.pdf [file pnas_0611571104_3.pdf]

Table 3. Connections between neural areas in Darwin XI’s simulated nervous system. A presynaptic neuronal unit connects to a postsynaptic neuronal unit with with a given probability (P) and a given projection topology (Arbor). This arborization shape can be rectangular with a particular height and width “ $\square$  h x w”, doughnut-shaped with an inner and outer radius “ $\Theta$  r1 x r2”, nontopological ”nontopo” in which any pair of presynaptic and postsynaptic neurons have an equal probability of being connected, or “S2Special” indicating that the post-synaptic neuronal unit took input from 3 neuronal units, each of which was in a different subarea of S1. The initial connection strengths  $c_{ij}(0)$  are set with uniform random probability within the range given by (minimum, maximum) in that column. A negative value of  $c_{ij}(0)$  denotes inhibitory connections. Connections can be either voltage-independent (VI) or voltage-dependent (VD).  $\phi$  denotes the persistence of the synapse. A nonzero value of  $\eta$ , the learning rate parameter, signals a plastic connection that changes according to the a modified BCM rule with parameters  $k_1$  and  $k_2$ . An explanation of neural area abbreviations can be found in the SI Text and in Fig. 2.

| Projection                         | Arbor           | $P$    | $c_{ij}(0)$     | Type | $\phi$ | $\eta$ | $k_1$  | $k_2$  |
|------------------------------------|-----------------|--------|-----------------|------|--------|--------|--------|--------|
| <i>Red</i> $\rightarrow V_R$       | $\square$ 1 x 1 | 1.0000 | 0.0120,0.0140   | VI   | 1.0000 | 0.0000 | 0.0000 | 0.0000 |
| $V_R \rightarrow V_R$              | $\square$ 2 x 2 | 0.4000 | 0.5000,0.6000   | VD   | 1.0000 | 0.0000 | 0.0000 | 0.0000 |
| <i>Green</i> $\rightarrow V_G$     | $\square$ 1 x 1 | 1.0000 | 0.0120,0.0140   | VI   | 1.0000 | 0.0000 | 0.0000 | 0.0000 |
| $V_G \rightarrow V_G$              | $\square$ 2 x 2 | 0.4000 | 0.5000,0.6000   | VD   | 1.0000 | 0.0000 | 0.0000 | 0.0000 |
| <i>Blue</i> $\rightarrow V_B$      | $\square$ 1 x 1 | 1.0000 | 0.0120,0.0140   | VI   | 1.0000 | 0.0000 | 0.0000 | 0.0000 |
| $V_B \rightarrow V_B$              | $\square$ 2 x 2 | 0.4000 | 0.5000,0.6000   | VD   | 1.0000 | 0.0000 | 0.0000 | 0.0000 |
| <i>Yellow</i> $\rightarrow V_Y$    | $\square$ 1 x 1 | 1.0000 | 0.0120,0.0140   | VI   | 1.0000 | 0.0000 | 0.0000 | 0.0000 |
| $V_Y \rightarrow V_Y$              | $\square$ 2 x 2 | 0.4000 | 0.5000,0.6000   | VD   | 1.0000 | 0.0000 | 0.0000 | 0.0000 |
| <i>Wid2</i> $\rightarrow V_{W2}$   | $\square$ 1 x 1 | 1.0000 | 0.0080,0.0090   | VI   | 1.0000 | 0.0000 | 0.0000 | 0.0000 |
| $V_{W2} \rightarrow V_{W2}$        | $\square$ 1 x 1 | 0.4000 | 0.5000,0.6000   | VD   | 1.0000 | 0.0000 | 0.0000 | 0.0000 |
| <i>Wid4</i> $\rightarrow V_{W4}$   | $\square$ 1 x 1 | 1.0000 | 0.0080,0.0090   | VI   | 1.0000 | 0.0000 | 0.0000 | 0.0000 |
| $V_{W4} \rightarrow V_{W4}$        | $\square$ 1 x 1 | 0.4000 | 0.5000,0.6000   | VD   | 1.0000 | 0.0000 | 0.0000 | 0.0000 |
| <i>Wid16</i> $\rightarrow V_{W16}$ | $\square$ 1 x 1 | 1.0000 | 0.0080,0.0090   | VI   | 1.0000 | 0.0000 | 0.0000 | 0.0000 |
| $V_{W16} \rightarrow V_{W16}$      | $\square$ 1 x 1 | 0.4000 | 0.5000,0.6000   | VD   | 1.0000 | 0.0000 | 0.0000 | 0.0000 |
| <i>Wid8</i> $\rightarrow V_{W8}$   | $\square$ 1 x 1 | 1.0000 | 0.0080,0.0090   | VI   | 1.0000 | 0.0000 | 0.0000 | 0.0000 |
| $V_{W8} \rightarrow V_{W8}$        | $\square$ 1 x 1 | 0.4000 | 0.5000,0.6000   | VD   | 1.0000 | 0.0000 | 0.0000 | 0.0000 |
| $V_{W2} \rightarrow V_{W4}$        | $\square$ 2 x 2 | 1.0000 | -0.0120,-0.0140 | VI   | 1.0000 | 0.0000 | 0.0000 | 0.0000 |
| $V_{W2} \rightarrow V_{W16}$       | $\square$ 2 x 2 | 1.0000 | -0.0120,-0.0140 | VI   | 1.0000 | 0.0000 | 0.0000 | 0.0000 |
| $V_{W2} \rightarrow V_{W8}$        | $\square$ 2 x 2 | 1.0000 | -0.0120,-0.0140 | VI   | 1.0000 | 0.0000 | 0.0000 | 0.0000 |
| $V_{W4} \rightarrow V_{W2}$        | $\square$ 2 x 2 | 1.0000 | -0.0120,-0.0140 | VI   | 1.0000 | 0.0000 | 0.0000 | 0.0000 |
| $V_{W4} \rightarrow V_{W16}$       | $\square$ 2 x 2 | 1.0000 | -0.0120,-0.0140 | VI   | 1.0000 | 0.0000 | 0.0000 | 0.0000 |
| $V_{W4} \rightarrow V_{W8}$        | $\square$ 2 x 2 | 1.0000 | -0.0120,-0.0140 | VI   | 1.0000 | 0.0000 | 0.0000 | 0.0000 |
| $V_{W16} \rightarrow V_{W2}$       | $\square$ 2 x 2 | 1.0000 | -0.0120,-0.0140 | VI   | 1.0000 | 0.0000 | 0.0000 | 0.0000 |
| $V_{W16} \rightarrow V_{W4}$       | $\square$ 2 x 2 | 1.0000 | -0.0120,-0.0140 | VI   | 1.0000 | 0.0000 | 0.0000 | 0.0000 |
| $V_{W16} \rightarrow V_{W8}$       | $\square$ 2 x 2 | 1.0000 | -0.0120,-0.0140 | VI   | 1.0000 | 0.0000 | 0.0000 | 0.0000 |
| $V_{W8} \rightarrow V_{W2}$        | $\square$ 2 x 2 | 1.0000 | -0.0120,-0.0140 | VI   | 1.0000 | 0.0000 | 0.0000 | 0.0000 |
| $V_{W8} \rightarrow V_{W4}$        | $\square$ 2 x 2 | 1.0000 | -0.0120,-0.0140 | VI   | 1.0000 | 0.0000 | 0.0000 | 0.0000 |
| $V_{W8} \rightarrow V_{W16}$       | $\square$ 2 x 2 | 1.0000 | -0.0120,-0.0140 | VI   | 1.0000 | 0.0000 | 0.0000 | 0.0000 |
| $V_R \rightarrow IT$               | nontopo         | 0.0500 | 0.0100,0.0400   | VI   | 1.0000 | 0.0000 | 0.0000 | 0.0000 |
| $V_G \rightarrow IT$               | nontopo         | 0.0500 | 0.0100,0.0400   | VI   | 1.0000 | 0.0000 | 0.0000 | 0.0000 |
| $V_B \rightarrow IT$               | nontopo         | 0.0500 | 0.0100,0.0400   | VI   | 1.0000 | 0.0000 | 0.0000 | 0.0000 |
| $V_Y \rightarrow IT$               | nontopo         | 0.0500 | 0.0100,0.0400   | VI   | 1.0000 | 0.0000 | 0.0000 | 0.0000 |

| Projection                      | Arbor                  | $p$    | $c_{ij}(0)$     | Type | $\phi$ | $\eta$ | $k_1$  | $k_2$  |
|---------------------------------|------------------------|--------|-----------------|------|--------|--------|--------|--------|
| $IT \rightarrow IT$             | $\square 1 \times 1$   | 1.0000 | 0.0800,0.1400   | VI   | 1.0000 | 0.0000 | 0.0000 | 0.0000 |
| $IT \rightarrow IT_i$           | $\Theta 2 \times 3$    | 1.0000 | 0.0600,0.0800   | VI   | 1.0000 | 0.0000 | 0.0000 | 0.0000 |
| $IT_i \rightarrow IT$           | $\square 1 \times 1$   | 1.0000 | -0.3600,-0.5000 | VI   | 1.0000 | 0.0000 | 0.0000 | 0.0000 |
| $V_{W2} \rightarrow PR$         | $\square 1 \times 1$   | 0.2500 | 0.2500,0.3000   | VI   | 1.0000 | 0.0000 | 0.0000 | 0.0000 |
| $V_{W4} \rightarrow PR$         | $\square 1 \times 1$   | 0.2500 | 0.2500,0.3000   | VI   | 1.0000 | 0.0000 | 0.0000 | 0.0000 |
| $V_{W16} \rightarrow PR$        | $\square 1 \times 1$   | 0.2500 | 0.2500,0.3000   | VI   | 1.0000 | 0.0000 | 0.0000 | 0.0000 |
| $V_{W8} \rightarrow PR$         | $\square 1 \times 1$   | 0.2500 | 0.2500,0.3000   | VI   | 1.0000 | 0.0000 | 0.0000 | 0.0000 |
| $PR \rightarrow PR$             | $\Theta 4 \times 6$    | 1.0000 | -0.0600,-0.0800 | VI   | 1.0000 | 0.0000 | 0.0000 | 0.0000 |
| $HD \rightarrow ATN$            | $\square 30 \times 2$  | 0.2000 | 0.0100,0.0200   | VI   | 1.0000 | 0.0000 | 0.0000 | 0.0000 |
| $HD \rightarrow M_{Hdg}$        | $\square 1 \times 1$   | 1.0000 | 0.0100,0.0100   | VI   | 1.0000 | 0.0000 | 0.0000 | 0.0000 |
| $ATN \rightarrow ATN_i$         | $\square 10 \times 15$ | 0.2500 | 0.0100,0.0200   | VI   | 1.0000 | 0.0000 | 0.0000 | 0.0000 |
| $ATN_i \rightarrow ATN$         | $\square 1 \times 1$   | 1.0000 | -0.3600,-0.5000 | VI   | 1.0000 | 0.0000 | 0.0000 | 0.0000 |
| $M_{Hdg} \rightarrow M_{Hdg}$   | $\square 1 \times 1$   | 1.0000 | 0.0600,0.0800   | VI   | 1.0000 | 0.0000 | 0.0000 | 0.0000 |
| $M_{Hdg} \rightarrow M_{Hdgi}$  | $\square 20 \times 30$ | 0.5000 | 0.1000,0.2000   | VI   | 1.0000 | 0.0000 | 0.0000 | 0.0000 |
| $M_{Hdgi} \rightarrow M_{Hdg}$  | $\square 1 \times 1$   | 1.0000 | -0.3600,-0.5000 | VI   | 1.0000 | 0.0000 | 0.0000 | 0.0000 |
| $T+ \rightarrow S$              | nontopo                | 1.0000 | 0.2500,0.2500   | VI   | 1.0000 | 0.0000 | 0.0000 | 0.0000 |
| $S \rightarrow CA1$             | nontopo                | 1.0000 | 0.0010,0.0020   | VD   | 1.0000 | 0.0000 | 0.0000 | 0.0000 |
| $S \rightarrow ATN$             | nontopo                | 1.0000 | 0.0010,0.0020   | VD   | 1.0000 | 0.0000 | 0.0000 | 0.0000 |
| $S \rightarrow IT$              | nontopo                | 1.0000 | 0.0010,0.0020   | VD   | 1.0000 | 0.0000 | 0.0000 | 0.0000 |
| $S \rightarrow PR$              | nontopo                | 1.0000 | 0.0010,0.0020   | VD   | 1.0000 | 0.0000 | 0.0000 | 0.0000 |
| $S \rightarrow M_{Hdg}$         | nontopo                | 1.0000 | 0.0500,0.0600   | VD   | 1.0000 | 0.0000 | 0.0000 | 0.0000 |
| $IT \rightarrow ECIN$           | nontopo                | 0.0007 | 0.4000,0.5000   | VI   | 1.0000 | 0.0000 | 0.0000 | 0.0000 |
| $PR \rightarrow ECIN$           | nontopo                | 0.0007 | 0.4000,0.5000   | VI   | 1.0000 | 0.0000 | 0.0000 | 0.0000 |
| $ATN \rightarrow ECIN$          | nontopo                | 0.0007 | 0.2000,0.2500   | VI   | 1.0000 | 0.0000 | 0.0000 | 0.0000 |
| $SMAP \rightarrow ECIN$         | nontopo                | 0.0007 | 0.2000,0.2500   | VI   | 1.0000 | 0.0000 | 0.0000 | 0.0000 |
| $SII \rightarrow ECIN$          | nontopo                | 0.0007 | 0.2000,0.2500   | VI   | 1.0000 | 0.0000 | 0.0000 | 0.0000 |
| $ECOUT \rightarrow IT$          | nontopo                | 0.0100 | 0.4000,0.4500   | VD   | 1.0000 | 0.0000 | 0.0000 | 0.0000 |
| $ECOUT \rightarrow PR$          | nontopo                | 0.0100 | 0.4000,0.4500   | VD   | 1.0000 | 0.0000 | 0.0000 | 0.0000 |
| $ECOUT \rightarrow ATN$         | nontopo                | 0.0100 | 0.4000,0.4500   | VD   | 1.0000 | 0.0000 | 0.0000 | 0.0000 |
| $ECOUT \rightarrow SMAP$        | nontopo                | 0.0100 | 0.4000,0.4500   | VD   | 1.0000 | 0.0000 | 0.0000 | 0.0000 |
| $ECOUT \rightarrow SII$         | nontopo                | 0.0100 | 0.4000,0.4500   | VD   | 1.0000 | 0.0000 | 0.0000 | 0.0000 |
| $ECIN \rightarrow ECIN_{ifb}$   | $\Theta 2 \times 3$    | 0.1000 | 0.4500,0.6000   | VI   | 1.0000 | 0.0000 | 0.0000 | 0.0000 |
| $ECIN_{ifb} \rightarrow ECIN$   | $\square 1 \times 1$   | 1.0000 | -0.9000,-1.2000 | VI   | 1.0000 | 0.0000 | 0.0000 | 0.0000 |
| $ECOUT \rightarrow ECOUT_{ifb}$ | $\Theta 2 \times 3$    | 0.1000 | 0.4500,0.6000   | VI   | 1.0000 | 0.0000 | 0.0000 | 0.0000 |
| $ECOUT_{ifb} \rightarrow ECOUT$ | $\square 1 \times 1$   | 1.0000 | -0.9000,-1.2000 | VI   | 1.0000 | 0.0000 | 0.0000 | 0.0000 |
| $DG \rightarrow DG$             | $\square 1 \times 1$   | 1.0000 | 0.1000,0.1400   | VI   | 1.0000 | 0.0000 | 0.0000 | 0.0000 |
| $DG \rightarrow DG_{ifb}$       | $\Theta 2 \times 3$    | 0.1000 | 0.4500,0.6000   | VI   | 1.0000 | 0.0000 | 0.0000 | 0.0000 |
| $DG_{ifb} \rightarrow DG$       | $\square 1 \times 1$   | 1.0000 | -0.9000,-1.2000 | VI   | 1.0000 | 0.0000 | 0.0000 | 0.0000 |
| $CA3 \rightarrow CA3_{ifb}$     | $\Theta 2 \times 3$    | 0.1000 | 0.4500,0.6000   | VI   | 1.0000 | 0.0000 | 0.0000 | 0.0000 |
| $CA3_{ifb} \rightarrow CA3$     | $\square 1 \times 1$   | 1.0000 | -0.9000,-1.2000 | VI   | 1.0000 | 0.0000 | 0.0000 | 0.0000 |
| $CA1 \rightarrow CA1_{ifb}$     | $\Theta 2 \times 3$    | 0.1000 | 0.4500,0.6000   | VI   | 1.0000 | 0.0000 | 0.0000 | 0.0000 |
| $CA1_{ifb} \rightarrow CA1$     | $\square 1 \times 1$   | 1.0000 | -0.9000,-1.2000 | VI   | 1.0000 | 0.0000 | 0.0000 | 0.0000 |
| $DG \rightarrow CA3_{iff}$      | $\Theta 2 \times 3$    | 0.1000 | 0.4500,0.6000   | VI   | 1.0000 | 0.0000 | 0.0000 | 0.0000 |
| $CA3_{iff} \rightarrow CA3$     | $\square 1 \times 1$   | 1.0000 | -0.9000,-1.2000 | VI   | 1.0000 | 0.0000 | 0.0000 | 0.0000 |
| $CA3 \rightarrow CA1_{iff}$     | $\Theta 2 \times 3$    | 0.1000 | 0.4500,0.6000   | VI   | 1.0000 | 0.0000 | 0.0000 | 0.0000 |

| Projection                  | Arbor                | $p$    | $c_{ij}(0)$     | Type | $\phi$ | $\eta$ | $k_1$  | $k_2$  |
|-----------------------------|----------------------|--------|-----------------|------|--------|--------|--------|--------|
| $CA1_{iff} \rightarrow CA1$ | $\square 1 \times 1$ | 1.0000 | -0.9000,-1.2000 | VI   | 1.0000 | 0.0000 | 0.0000 | 0.0000 |
| $BFECIN \rightarrow ECIN$   | nontopo              | 0.0500 | -0.0100,-0.0200 | VI   | 1.0000 | 0.0000 | 0.0000 | 0.0000 |
| $BFECOUT \rightarrow ECOUT$ | nontopo              | 0.0500 | -0.0100,-0.0200 | VI   | 1.0000 | 0.0000 | 0.0000 | 0.0000 |
| $BFDG \rightarrow DG$       | nontopo              | 0.0500 | -0.0100,-0.0200 | VI   | 1.0000 | 0.0000 | 0.0000 | 0.0000 |
| $BFCA3 \rightarrow CA3$     | nontopo              | 0.0500 | -0.0100,-0.0200 | VI   | 1.0000 | 0.0000 | 0.0000 | 0.0000 |
| $BFCA1 \rightarrow CA1$     | nontopo              | 0.0500 | -0.0100,-0.0200 | VI   | 1.0000 | 0.0000 | 0.0000 | 0.0000 |
| $WLLT \rightarrow SILT$     | $\square 0 \times 0$ | 1.0000 | 0.6000,0.7500   | VI   | 1.0000 | 0.0000 | 0.0000 | 0.0000 |
| $WLLM \rightarrow SILM$     | $\square 0 \times 0$ | 1.0000 | 0.6000,0.7500   | VI   | 1.0000 | 0.0000 | 0.0000 | 0.0000 |
| $WRLT \rightarrow SIRT$     | $\square 0 \times 0$ | 1.0000 | 0.6000,0.7500   | VI   | 1.0000 | 0.0000 | 0.0000 | 0.0000 |
| $WRLM \rightarrow SIRM$     | $\square 0 \times 0$ | 1.0000 | 0.6000,0.7500   | VI   | 1.0000 | 0.0000 | 0.0000 | 0.0000 |
| $SILT \rightarrow SILT$     | $\Theta 2 \times 8$  | 1.0000 | -0.4500,-0.6000 | VI   | 1.0000 | 0.0000 | 0.0000 | 0.0000 |
| $SILM \rightarrow SILM$     | $\Theta 2 \times 8$  | 1.0000 | -0.4500,-0.6000 | VI   | 1.0000 | 0.0000 | 0.0000 | 0.0000 |
| $SIRT \rightarrow SIRT$     | $\Theta 2 \times 8$  | 1.0000 | -0.4500,-0.6000 | VI   | 1.0000 | 0.0000 | 0.0000 | 0.0000 |
| $SIRM \rightarrow SIRM$     | $\Theta 2 \times 8$  | 1.0000 | -0.4500,-0.6000 | VI   | 1.0000 | 0.0000 | 0.0000 | 0.0000 |
| $SILT \rightarrow SII$      | S2special            | 0.0350 | 0.2500,0.2500   | VI   | 1.0000 | 0.0000 | 0.4500 | 0.4500 |
| $SILM \rightarrow SII$      | S2special            | 0.0350 | 0.2500,0.2500   | VI   | 1.0000 | 0.0000 | 0.4500 | 0.4500 |
| $SIRT \rightarrow SII$      | S2special            | 0.0350 | 0.2500,0.2500   | VI   | 1.0000 | 0.0000 | 0.4500 | 0.4500 |
| $SIRM \rightarrow SII$      | S2special            | 0.0350 | 0.2500,0.2500   | VI   | 1.0000 | 0.0000 | 0.4500 | 0.4500 |
| $ECIN \rightarrow ECOUT$    | nontopo              | 0.0500 | 0.0400,0.0800   | VI   | 1.0000 | 0.0000 | 0.0000 | 0.0000 |
| $ECOUT \rightarrow ECIN$    | nontopo              | 0.0500 | 0.0400,0.0800   | VI   | 1.0000 | 0.0000 | 0.0000 | 0.0000 |
| $IT \rightarrow PR$         | nontopo              | 0.0050 | 0.0100,0.0200   | VI   | 1.0000 | 0.0000 | 0.4500 | 0.4500 |
| $IT \rightarrow ATN$        | nontopo              | 0.0050 | 0.0100,0.0200   | VI   | 1.0000 | 0.0000 | 0.4500 | 0.4500 |
| $PR \rightarrow IT$         | nontopo              | 0.0050 | 0.0100,0.0200   | VI   | 1.0000 | 0.0000 | 0.4500 | 0.4500 |
| $PR \rightarrow ATN$        | nontopo              | 0.0050 | 0.0100,0.0200   | VI   | 1.0000 | 0.0000 | 0.4500 | 0.4500 |
| $ATN \rightarrow PR$        | nontopo              | 0.0050 | 0.0100,0.0200   | VI   | 1.0000 | 0.0000 | 0.4500 | 0.4500 |
| $ATN \rightarrow IT$        | nontopo              | 0.0050 | 0.0100,0.0200   | VI   | 1.0000 | 0.0000 | 0.4500 | 0.4500 |
| $ECIN \rightarrow DG$       | $\square 3 \times 3$ | 0.1000 | 0.4500,0.6000   | VI   | 0.2500 | 0.0500 | 0.9000 | 0.4500 |
| $ECIN \rightarrow CA3$      | $\square 3 \times 3$ | 0.0500 | 0.1500,0.2000   | VI   | 0.2500 | 0.0500 | 0.9000 | 0.4500 |
| $ECIN \rightarrow CA1$      | $\square 3 \times 3$ | 0.0400 | 0.3000,0.4000   | VI   | 0.2500 | 0.0500 | 0.9000 | 0.4500 |
| $DG \rightarrow CA3$        | $\square 3 \times 3$ | 0.0300 | 0.4500,0.6000   | VI   | 0.2500 | 0.0500 | 0.9000 | 0.4500 |
| $CA3 \rightarrow CA3$       | nontopo              | 0.1000 | 0.1500,0.2000   | VI   | 0.2500 | 0.0500 | 0.9000 | 0.4500 |
| $CA3 \rightarrow CA1$       | $\square 3 \times 3$ | 0.0800 | 0.4500,0.6000   | VI   | 0.2500 | 0.0500 | 0.9000 | 0.4500 |
| $CA1 \rightarrow ECOUT$     | $\square 3 \times 3$ | 0.2500 | 0.6000,0.7500   | VI   | 0.2500 | 0.0500 | 0.9000 | 0.4500 |
| $CA1 \rightarrow S$         | nontopo              | 1.0000 | 0.0100,0.0200   | VI   | 1.0000 | 0.0050 | 0.9000 | 0.4500 |
| $CA1 \rightarrow M_{Hdg}$   | nontopo              | 1.0000 | 0.0100,0.0200   | VD   | 1.0000 | 0.0500 | 0.9000 | 0.4500 |
